# Supplementary material for: Early Complications in Kidney Donors and Course of Health-related Quality of Life 12 mo After Donation: An Analysis of the Swiss Organ Living-Donor Health Registry
Source: PubMed Central journal article supplement — Transplant Direct. 2024 Oct 10;10(11):e1716. doi: 10.1097/TXD.0000000000001716 (PMC11469818; doi:10.1097/txd.0000000000001716), 2024-10-10
Supplement: txd-10-e1716-s001.pdf [file txd-10-e1716-s001.pdf]

**Table S1. Distribution of surgical approach within different time periods (n=2379)**

| <b>Parameter</b>           | <b>Open<br/>nephrectomy, n (%)</b> | <b>Laparoscopic transabdominal<br/>nephrectomy, n (%)</b> | <b>Laparoscopic retroperitoneal<br/>nephrectomy, n (%)</b> |
|----------------------------|------------------------------------|-----------------------------------------------------------|------------------------------------------------------------|
| <b>Time period (years)</b> |                                    |                                                           |                                                            |
| - 1998-2008                | 243 (55.1)                         | 440 (36.9)                                                | 229 (30.7)                                                 |
| - 2008-2018                | 148 (33.6)                         | 543 (45.5)                                                | 411 (55.2)                                                 |
| - 2018-2022                | 50 (11.3)                          | 210 (17.6)                                                | 105 (14.1)                                                 |
| - Total                    | 441 (100)                          | 1193 (100)                                                | 745 (100)                                                  |

**Table S2. Baseline donor characteristics stratified according to donors with/without the occurrence of any early complication, n=2379**

|                                                   | Donors with any early complication<br>(n=404) | Donors without any early complications<br>(n=1975) | p-value |
|---------------------------------------------------|-----------------------------------------------|----------------------------------------------------|---------|
| - Age at donation, yr                             | 54.1 (±11.5)                                  | 52.6 (±11.2)                                       | 0.02    |
| - Age grouping at donation, n (%)                 |                                               |                                                    |         |
| - < 30 yr                                         | 8 (2.0)                                       | 56 (2.8)                                           | 0.12    |
| - 30-40 yr                                        | 43 (10.6)                                     | 241 (12.2)                                         |         |
| - 41-49 yr                                        | 91 (22.5)                                     | 450 (22.8)                                         |         |
| - 50-60 yr                                        | 131 (32.4)                                    | 705 (35.7)                                         |         |
| - 61-70, yr                                       | 104 (25.8)                                    | 439 (22.2)                                         |         |
| - > 70 yr                                         | 27 (6.7)                                      | 84 (4.3)                                           |         |
| - Sex, n (%)                                      |                                               |                                                    |         |
| - Female                                          | 250 (61.9)                                    | 1282 (64.9)                                        | 0.25    |
| - Male                                            | 154 (38.1)                                    | 693 (35.1)                                         |         |
| - Donor-recipient relation, n (%)                 |                                               |                                                    |         |
| - Parents                                         | 105 (26.0)                                    | 467 (23.7)                                         | 0.48    |
| - Siblings                                        | 92 (22.8)                                     | 421 (21.3)                                         |         |
| - Other relatives                                 | 14 (3.5)                                      | 103 (5.2)                                          |         |
| - Partners                                        | 137 (33.9)                                    | 705 (35.7)                                         |         |
| - Other non-relatives                             | 56 (13.8)                                     | 279 (14.1)                                         |         |
| - KPD, n (%)                                      | 4 (1.0)                                       | 47 (2.4)                                           |         |
| - Surgical method, n (%)                          |                                               |                                                    |         |
| - Nephrectomy open                                | 101 (25)                                      | 340 (17.2)                                         | <0.0001 |
| - Laparoscopic transabdominal                     | 151 (37.4)                                    | 1042 (52.8)                                        |         |
| - Laparoscopic retroperitoneal                    | 152 (37.6)                                    | 593 (30.0)                                         |         |
| - Site, n (%)                                     |                                               |                                                    |         |
| - Right kidney                                    | 87 (21.5)                                     | 511 (25.9)                                         | 0.0003  |
| - Left kidney                                     | 222 (55.0)                                    | 1160 (58.7)                                        |         |
| - Unknown                                         | 95 (32.5)                                     | 304 (15.4)                                         |         |
| - Kidney function pre-donation                    |                                               |                                                    |         |
| - Creatinine, µmol/l                              | 67.4 (±13.8)                                  | 67.8 (±13.1)                                       | 0.65    |
| - eGFR, CKD-EPI (ml/min/1.73m <sup>2</sup> )      | 94.5 (±15.0)                                  | 94.7 (±13.7)                                       | 0.77    |
| - UPCR, mg/mmol <sup>§</sup>                      | 9.4 (±6.6)                                    | 9.2 (±5.3)                                         | 0.62    |
| - UACR, mg/mmol <sup>§</sup>                      | 1.2 (±4.1)                                    | 1.1 (±2.0)                                         | 0.70    |
| - Blood pressure pre-donation, n (%)              |                                               |                                                    |         |
| - Systolic blood pressure, mmHg <sup>Δ</sup>      | 128.2 (±14.3)                                 | 126.8 (±13.4)                                      | 0.09    |
| - Diastolic blood pressure, mmHg <sup>Δ</sup>     | 77.7 (±9.3)                                   | 77.6 (±8.7)                                        | 0.76    |
| - Weight, kg                                      | 71.5 (±13.3)                                  | 71.9 (±12.9)                                       | 0.59    |
| - BMI, kg/m <sup>2</sup>                          | 25.4 (±3.7)                                   | 25.5 (±3.8)                                        | 0.53    |
| - BMI < 30 kg/m <sup>2</sup> , n (%) <sup>*</sup> | 347 (86.5)                                    | 1738 (88.3)                                        | 0.50    |
| - BMI 30-35 kg/m <sup>2</sup> , n (%)             | 50 (12.5)                                     | 207 (10.5)                                         |         |
| - BMI > 35 kg/m <sup>2</sup> , n (%)              | 4 (1.0)                                       | 23 (1.2)                                           |         |
| - HbA1c, % <sup>#</sup>                           | 5.4% (±0.3)                                   | 5.4% (±0.3)                                        | 0.45    |

Abbreviations: yr=years, KPD=kidney paired donation, eGFR=estimated glomerular filtration rate (calculated by the CKD-EPI formula; in ml/min/1.73m<sup>2</sup> of body surface), which was available for 2327 donors. CKD-EPI=Chronic Kidney Disease Epidemiology Collaboration, §UPCR=urine protein-to-creatinine ratio and §UACR=urine albumin-to-creatinine ratio, which was only calculated for donors with undiluted urine (i.e., urine creatinine ≥ 3 mmol/l; n=1796). \*\*BMI=Body mass index, which was available for 2369 donors before donation, #HbA1c= Hemoglobin A1c, available for 430 donors before donation since 08/2017. ΔPre-donation systolic/diastolic blood pressure measurements were available for 2363 donors.

Categorical data are summarized as counts and percentages and analyzed using Fisher's exact test or Pearson's chi-squared test, as appropriate. Continuous data were summarized as means (±SD) and were analyzed using a t test.

**Table S3. Independent risk factors of low health-related quality of life based on PCS 12 months after donation, n=1548\***

|                                             | Univariate logistic regression analysis<br>(95% CI); p-value | Multivariable logistic regression<br>analysis<br>(95% CI); p-value <sup>#</sup> |
|---------------------------------------------|--------------------------------------------------------------|---------------------------------------------------------------------------------|
| <b>Risk factors of a low PCS</b>            |                                                              |                                                                                 |
| - Sex (male vs female)                      | 1.54 (0.76-3.12); 0.23                                       | 1.64 (0.80- 3.37); 0.18                                                         |
| - Donor age (61 versus 45 years)            | 0.75 (0.42-1.35); 0.52                                       | 0.81 (0.44- 1.46); 0.58                                                         |
| - Any severe complication (yes vs no)       | 2.58 (0.59-11.17); 0.21                                      | 2.64 (0.59-11.79); 0.20                                                         |
| - Worsening of EB <sup>++</sup> (yes vs no) | 4.12 (0.93-18.20); 0.06                                      | 3.51 (0.77-15.93); 0.17                                                         |

Abbreviations: CI= confidence interval, PCS= physical component scale, EB= emotional bonding

Multivariable logistic regression analysis was performed to analyse independent risk factors of low PCS. Low PCS was defined as a scale  $\leq 30$  (n=31). Individual risk factors were selected based on pre-existing knowledge about potential predictors of low health-related quality of life. The variables chosen for the final model were sex, age, occurrence of any severe complication as well as the emotional bonding (worsening yes vs no). A two-tailed p-value  $<0.05$  was considered to indicate statistical significance.

\*Complete post-donation questionnaires 12 months after LKD including information about the emotional bonding were available of n=1548 donors.

<sup>#</sup>The last column represents the whole multivariable model.

<sup>++</sup>The question evaluating emotional bonding was: "How did the relationship to the organ recipient change after donation?"

**Table S4. Independent risk factors of low health-related quality of life based on MCS 12 months after donation, n=1548\***

|                                             | Univariate logistic regression analysis<br>(95% CI); p-value | Multivariable logistic regression<br>analysis<br>(95% CI); p-value <sup>#</sup> |
|---------------------------------------------|--------------------------------------------------------------|---------------------------------------------------------------------------------|
| <b>Risk factor of a low MCS</b>             |                                                              |                                                                                 |
| - Sex (male vs female)                      | 1.56 (0.79-3.10); 0.20                                       | 1.63 (0.80- 3.32); 0.18                                                         |
| - Donor age (61 versus 45 years)            | 0.43 (0.22-0.84); 0.05                                       | 0.44 (0.22-0.86); 0.05                                                          |
| - Any severe complication (yes vs no)       | 2.42 (0.56-10.44); 0.24                                      | 2.19 (0.45-10.72); 0.33                                                         |
| - Worsening of EB <sup>**</sup> (yes vs no) | 12.12 (4.28-34.31); <0.0001                                  | 10.42 (3.56- 30.50); <0.0001                                                    |

Abbreviations: CI= confidence interval, MCS= mental component scale, EB= emotional bonding

Multivariable logistic regression analysis was performed to analyse independent risk factors of low MCS. Low MCS was defined as a scale  $\leq 30$  (n=33). Individual risk factors were selected based on pre-existing knowledge about potential predictors of low health-related quality of life. The variables chosen for the final model were sex, age, occurrence of any severe complication as well as the emotional bonding (worsening yes vs no). A two-tailed p-value  $<0.05$  was considered to indicate statistical significance.

\*Complete post-donation questionnaires 12 months after LKD including information about the emotional bonding were available of n=1548 donors.

<sup>#</sup>The last column represents the whole multivariable model.

<sup>\*\*</sup>The question evaluating emotional bonding was: "How did the relationship to the organ recipient change after donation?"

**Table S5. Independent predictors of early major complications, n=2379**

|                                             | Univariate logistic regression analysis (95% CI); p-value | Multivariable logistic regression analysis (95% CI); p-value <sup>#</sup> |
|---------------------------------------------|-----------------------------------------------------------|---------------------------------------------------------------------------|
| <b>Risk factors of major complications*</b> |                                                           |                                                                           |
| - Sex (male versus female)                  | 1.00 (0.57-1.73); 0.99                                    | 1.16 (0.65- 2.07); 0.61                                                   |
| - Donor age (61 versus 45 years)            | 1.80 (1.21-2.68); 0.005                                   | 1.76 (1.17-2.68); 0.01                                                    |
| - BMI (28 versus 22.9 kg/m <sup>2</sup> )   | 0.82 (0.59-1.14); 0.10                                    | 0.77 (0.55-1.07); 0.07                                                    |
| - Site of nephrectomy, left versus right    | 0.99 (0.54-1.83); 0.98                                    |                                                                           |
| - Year of donation                          |                                                           |                                                                           |
| - 1998-2008                                 | ref                                                       | ref                                                                       |
| - 2009-2018                                 | 0.51 (0.17-1.50); 0.36                                    | 1.02 (0.56- 1.86); 0.94                                                   |
| - 2019-2022                                 | 0.69 (0.30-1.60); 0.85                                    | 0.63 (0.25- 1.55); 0.32                                                   |
| - Surgical method                           |                                                           |                                                                           |
| ...- Laparoscopic transabdominal            | ref                                                       | ref                                                                       |
| ...- Laparoscopic retroperitoneal           | 2.42 (1.38-4.25); 0.002                                   | 2.11 (1.84-3.75); 0.008                                                   |
| ...- Open nephrectomy                       | 0.51 (0.17-1.50) ; 0.22                                   | 0.50 (0.17-1.48) ; 0.21                                                   |

Abbreviations: CI=confidence interval, BMI= body mass index.

Multivariable logistic regression analysis was performed to analyze the independent risk factors for major early complications\*, defined as Dindo-Clavien classification  $\geq 3a$  (n=56 donors). The odds ratios for age and BMI were reported as a change from the lower quartile (25<sup>th</sup> percentile) to the upper quartile (75<sup>th</sup> percentile). To account for the long observation time and potential procedural changes, the years of transplantations were forced into the model as a potential confounder. Thus, the point effects of the multivariable model must be interpreted with caution as the model was not made for transplantation eras. The C-statistic of the full model was 0.682.

<sup>#</sup>The last column represents the entire multivariable model.

**Table S6. Independent predictors of early major complications, n=1938**

|                                             | Univariate logistic regression analysis (95% CI); p-value | Multivariable logistic regression analysis (95% CI); p-value <sup>#</sup> |
|---------------------------------------------|-----------------------------------------------------------|---------------------------------------------------------------------------|
| <b>Risk factors of major complications*</b> |                                                           |                                                                           |
| - Sex (male versus female)                  | 0.96 (0.54-1.71); 0.89                                    | 1.08 (0.59-1.94); 0.79                                                    |
| - Donor age                                 | 1.90 (1.25-2.91); 0.003                                   | 1.05 (1.02-1.08); 0.001                                                   |
| - BMI                                       |                                                           |                                                                           |
| 20.0 – 24.9 kg/m <sup>2</sup>               | ref                                                       | ref                                                                       |
| < 20 kg/m <sup>2</sup>                      | 2.19 (0.80-5.17); 0.09                                    | 2.60 (0.93-6.32); 0.05                                                    |
| 25 - 29.9 kg/m <sup>2</sup>                 | 0.88 (0.47-1.63); 0.69                                    | 0.89 (0.47-1.69); 0.73                                                    |
| ≥ 30                                        | 1.09 (0.43-2.44); 0.84                                    | 0.85 (0.28-2.12); 0.75                                                    |
| - Site of nephrectomy, left versus right    | 1.00 (0.53-1.88); 0.99                                    |                                                                           |
| - Year of donation                          |                                                           |                                                                           |
| - 1998-2008                                 | ref                                                       | ref                                                                       |
| - 2009-2018                                 | 0.94 (0.52-1.74); 0.36                                    | 0.92 (0.50-1.73); 0.79                                                    |
| - 2019-2022                                 | 0.78 (0.34-1.81); 0.85                                    | 0.59 (0.21-1.44); 0.27                                                    |

Abbreviations: CI=confidence interval, BMI= body mass index.

Multivariable logistic regression analysis was performed to analyze the independent risk factors for major early complications\*, defined as Dindo-Clavien classification  $\geq 3a$  (n=56 donors). The analysis focused on donors with the nowadays preferred laparoscopic surgical approach. Thus, we excluded donors with open nephrectomy within this sensitivity analysis (n=441). To account for the long observation time and potential procedural changes, the years of transplantations were forced into the model as a potential confounder. Thus, the point effects of the multivariable model must be interpreted with caution as the model was not made for transplantation eras. The C-statistic of the full model was 0.651.

<sup>#</sup>The last column represents the entire multivariable model.
